# Supplementary material for: Impact of particle size on the nutrition release and antioxidant activity of rape, buckwheat and rose bee pollens
Source: Royal Society of Chemistry journal article supplement (doi:10.1039/d2fo03119a), 2023-01-01
Supplement: d2fo03119a1.pdf [file d2fo03119a1.pdf]

**Figure S1. Schematic representation of sample processing.**

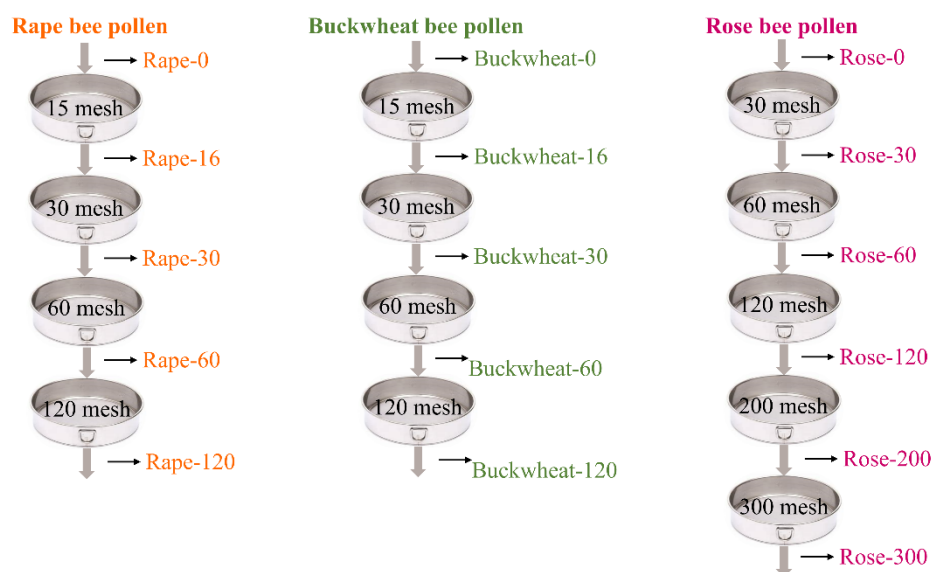

**Table S1. Chemical composition of rape, buckwheat and rose bee pollen samples.**

|                 | <b>Rape</b>             | <b>Buckwheat</b>        | <b>Rose</b>             |
|-----------------|-------------------------|-------------------------|-------------------------|
| Ash (%)         | 3.25±0.04 <sup>b</sup>  | 4.37±0.23 <sup>a</sup>  | 2.41±0.12 <sup>c</sup>  |
| Fat (%)         | 6.80±0.36 <sup>b</sup>  | 8.46±0.42 <sup>a</sup>  | 1.65±0.14 <sup>c</sup>  |
| Protein (%)     | 30.88±0.65 <sup>a</sup> | 18.30±0.57 <sup>b</sup> | 32.24±1.44 <sup>a</sup> |
| Total sugar (%) | 36.68±0.96 <sup>c</sup> | 42.43±0.55 <sup>b</sup> | 52.17±0.47 <sup>a</sup> |
| Starch (%)      | 8.59±1.04 <sup>c</sup>  | 13.61±0.95 <sup>b</sup> | 18.02±1.68 <sup>a</sup> |
| Fiber (%)       | 7.50±0.76 <sup>b</sup>  | 8.77±0.4 <sup>a</sup>   | 8.55±0.82 <sup>a</sup>  |

Results were expressed on a dry basis. Values with different letters in the same row are significantly different ( $p<0.05$ ) from each other, which was carried out using one-way analysis of variance (ANOVA), followed by Duncan's multiple range tests.

**Table S2. Elemental concentrations of rape, buckwheat and rose bee pollen samples.**

|                             | <b>Rape</b>              | <b>Buckwheat</b>         | <b>Rose</b>             |
|-----------------------------|--------------------------|--------------------------|-------------------------|
| <b>Macroelement</b>         |                          |                          |                         |
| K (g/kg)                    | 5.10±0.10 <sup>b</sup>   | 11.40±0.00 <sup>a</sup>  | 5.40±0.20 <sup>b</sup>  |
| Ca (g/kg)                   | 3.23±0.02 <sup>a</sup>   | 3.05±0.05 <sup>b</sup>   | 3.25±0.05 <sup>a</sup>  |
| Mg (g/kg)                   | 1.72±0.02 <sup>b</sup>   | 5.44±0.04 <sup>a</sup>   | 1.21±0.01 <sup>c</sup>  |
| Na (mg/kg)                  | 66.50±3.50 <sup>a</sup>  | 31.00±3.00 <sup>b</sup>  | 32.50±2.50 <sup>b</sup> |
| <b>Microelement</b>         |                          |                          |                         |
| Fe (mg/kg)                  | 110.50±0.50 <sup>b</sup> | 153.50±0.50 <sup>a</sup> | 95.00±2.00 <sup>c</sup> |
| Zn (mg/kg)                  | 39.50±0.50 <sup>a</sup>  | 15.00±1.00 <sup>b</sup>  | 38.00±2.00 <sup>a</sup> |
| Mn (mg/kg)                  | 25.50±0.50 <sup>b</sup>  | 22.00±1.00 <sup>b</sup>  | 182.5±2.5 <sup>a</sup>  |
| Cu (mg/kg)                  | 8.35±0.25 <sup>b</sup>   | 4.25±0.05 <sup>c</sup>   | 11.50±0.50 <sup>a</sup> |
| <b>Heavy metal elements</b> |                          |                          |                         |
| Cr (mg/kg)                  | 0.23±0.02 <sup>a</sup>   | 0.17±0.04 <sup>a</sup>   | 0.11±0.02 <sup>a</sup>  |
| Pb (mg/kg)                  | 0.32±0.06 <sup>a</sup>   | 0.27±0.13 <sup>a</sup>   | 0.15±0.00 <sup>a</sup>  |
| Cd (mg/kg)                  | <0.10                    | <0.10                    | <0.10                   |
| As (mg/kg)                  | <0.050                   | <0.050                   | <0.050                  |

Results were expressed on a dry basis. Values with different letters in the same row are significantly different ( $p<0.05$ ) from each other, which was carried out using one-way analysis of variance (ANOVA), followed by Duncan's multiple range tests.
